# Supplementary material for: Alleviation Effects of GQD, a Traditional Chinese Medicine Formula, on Diabetes Rats Linked to Modulation of the Gut Microbiome
Source: PubMed Central journal article supplement (PMC8531589; doi:10.3389/fcimb.2021.740236), 2021-10-08

A

DM0w DM12w

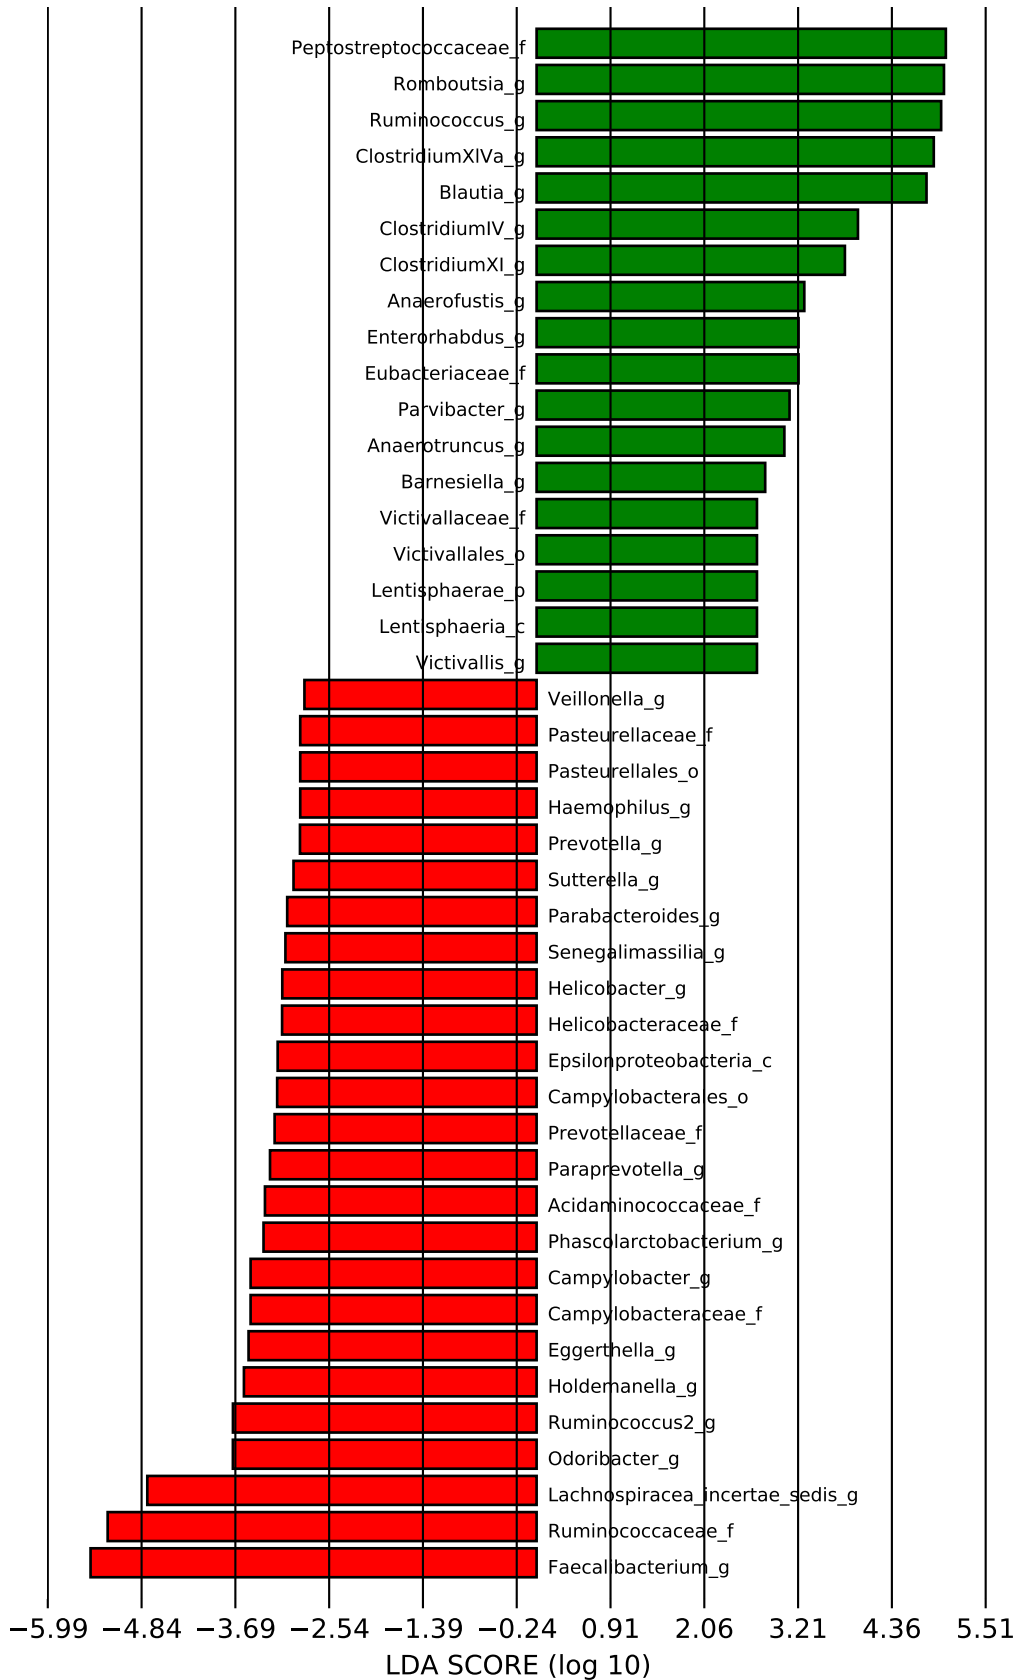

B

■ GQD0w    ■ GQD12w
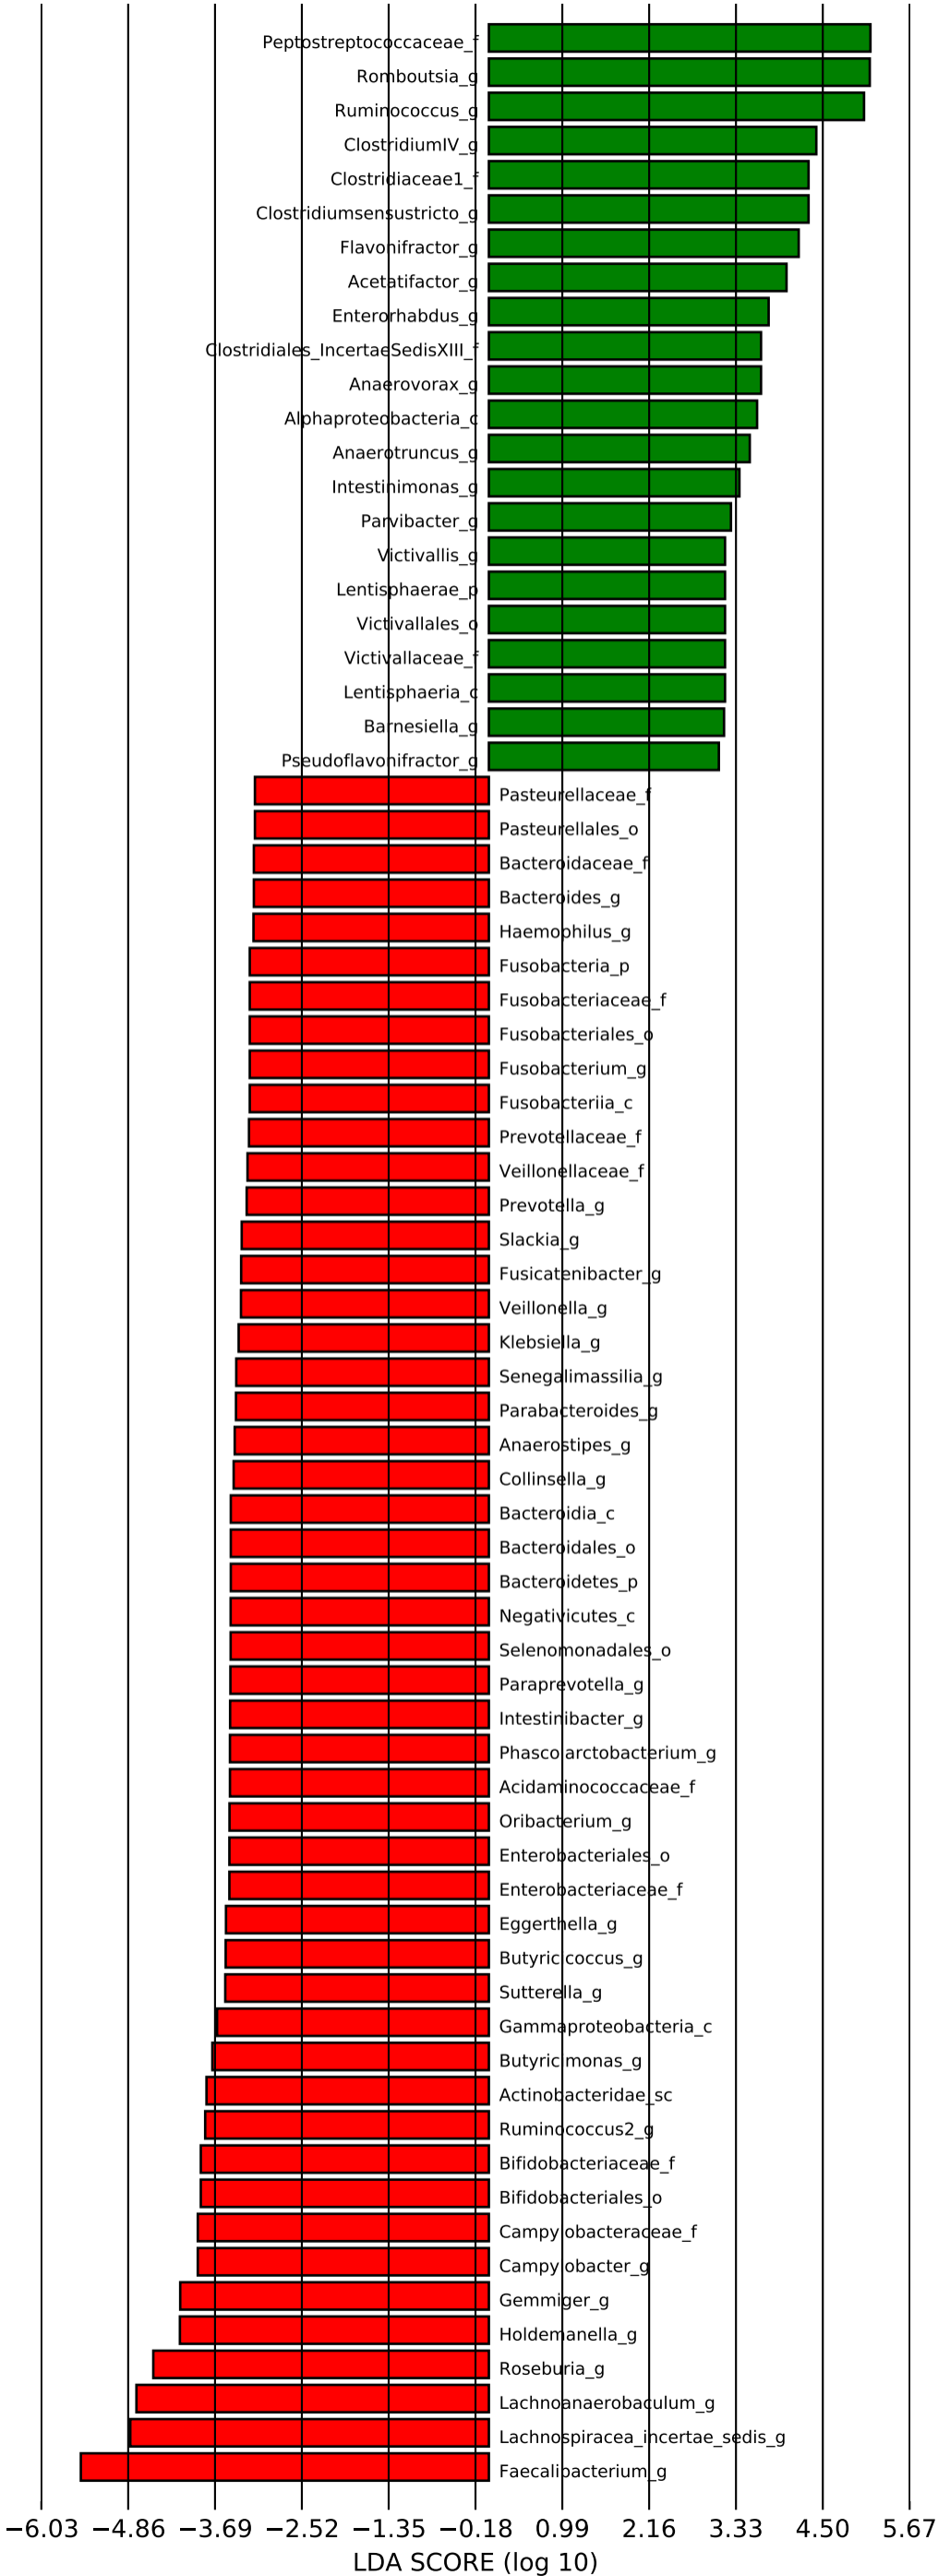

C

■ Met0w    ■ Met12w
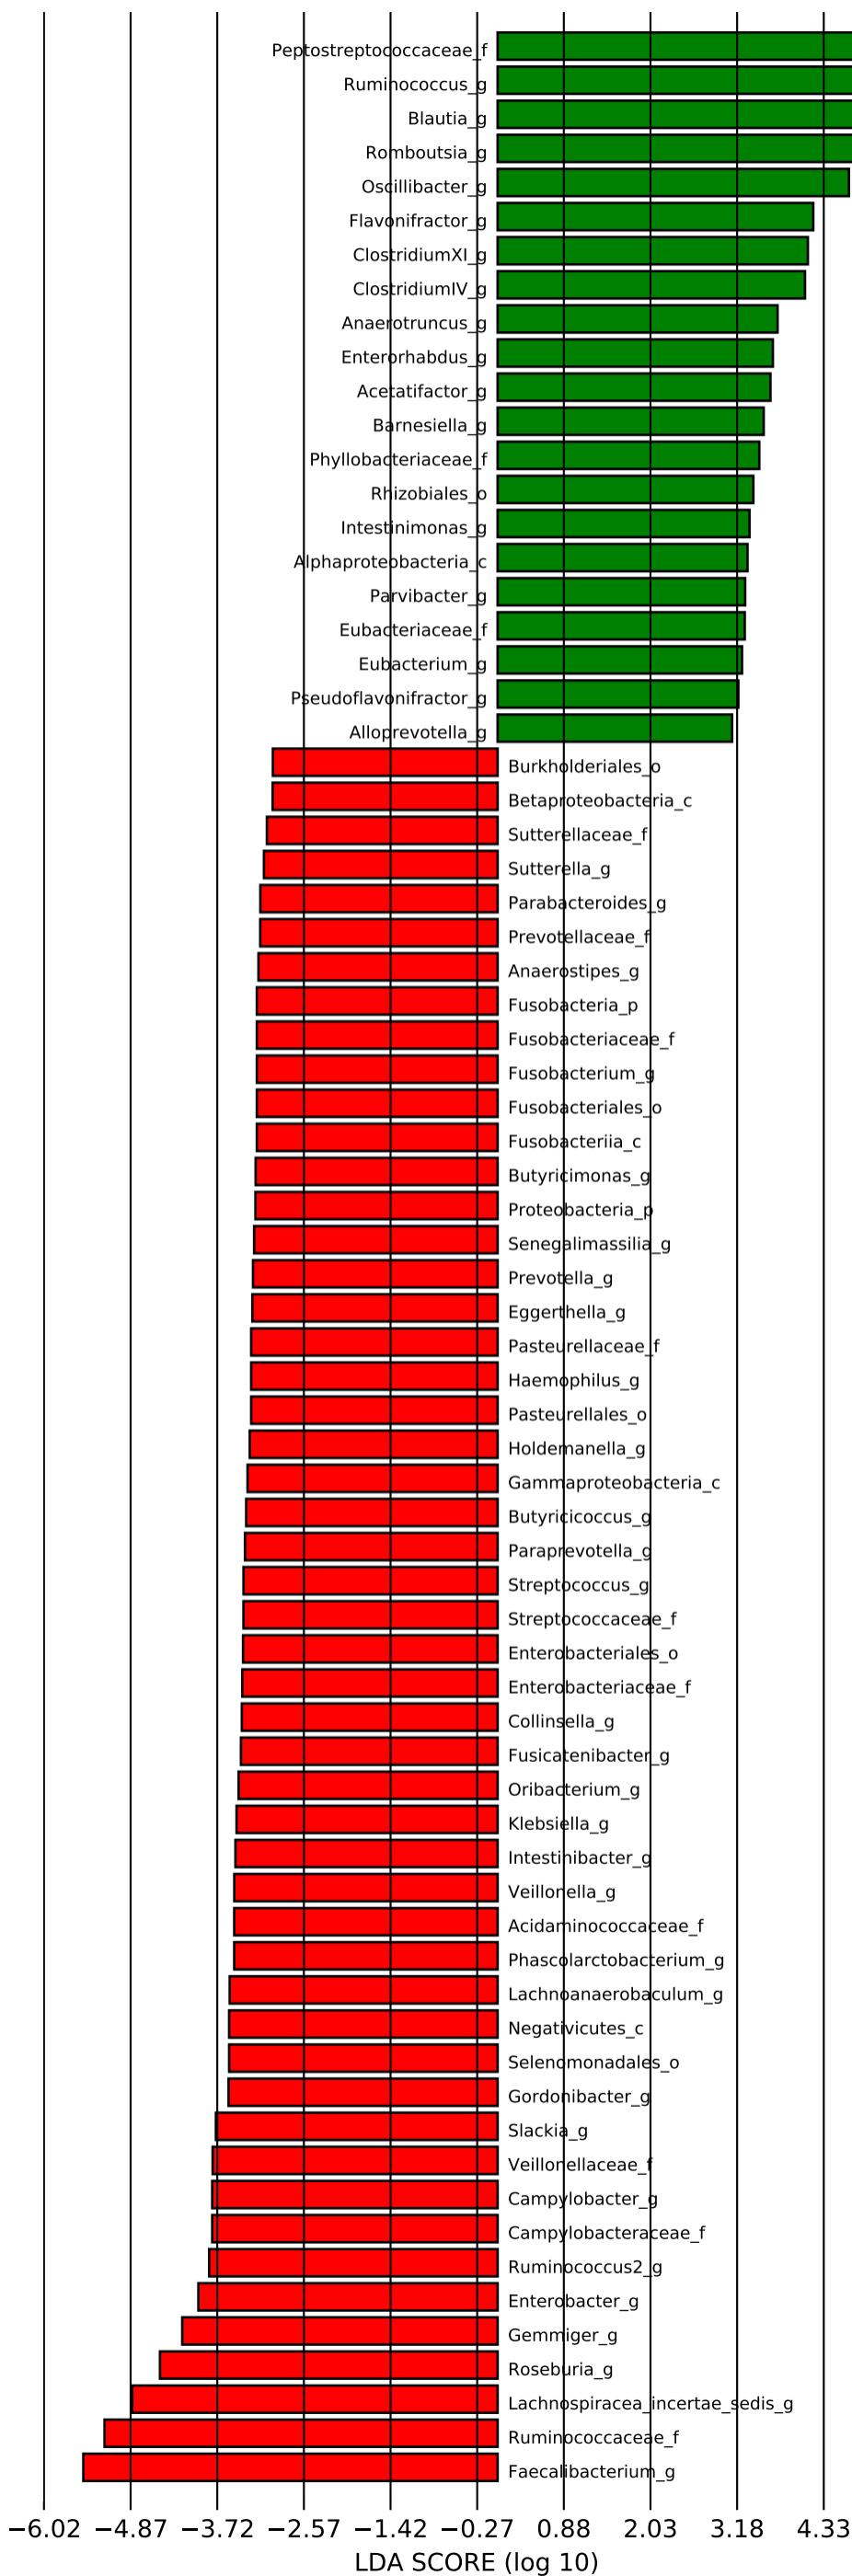

D

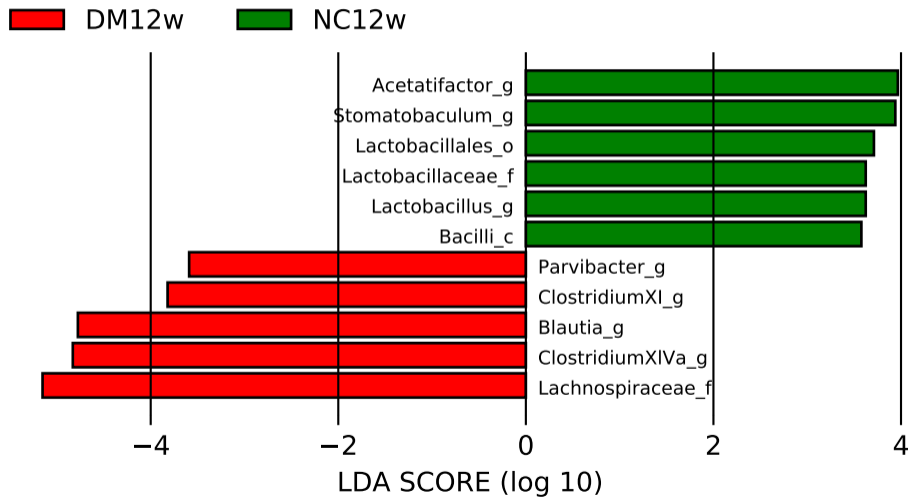

E

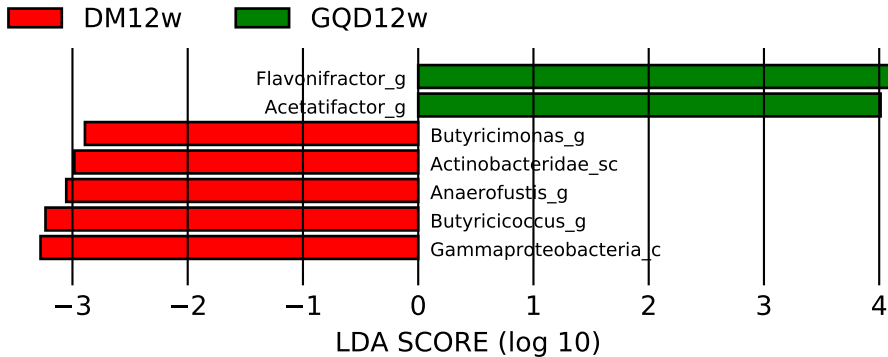

F

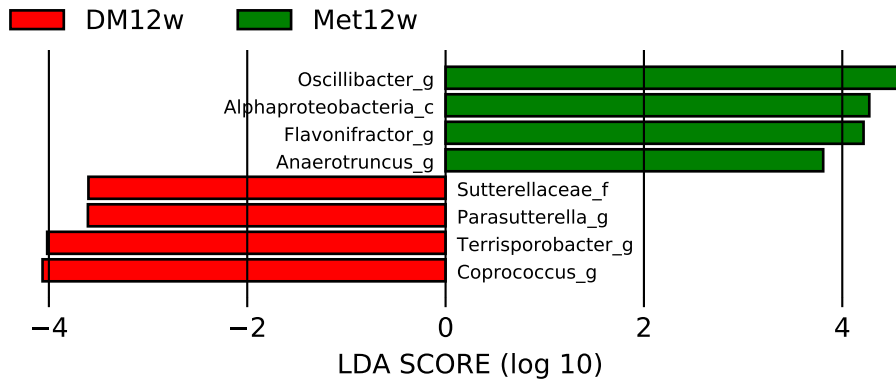

G

Met12w

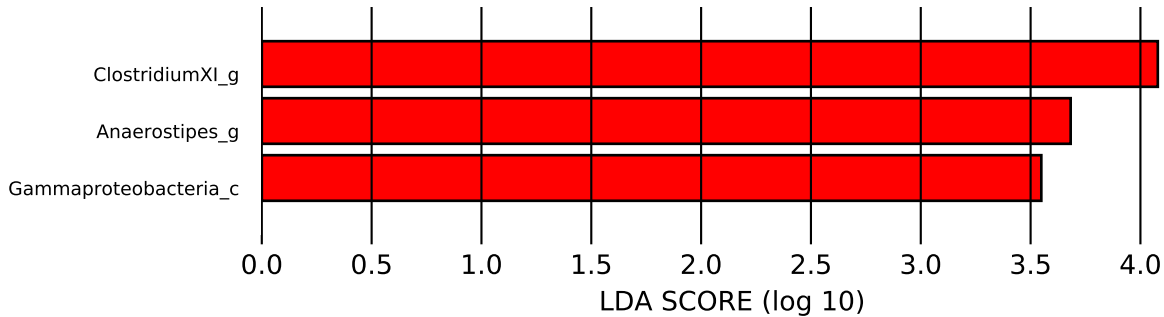

Supplement: Image_2.pdf [file Image_2.pdf]
